# Supplementary material for: Aerosol size distribution changes in FIREX-AQ biomass burning plumes: the impact of plume concentration on coagulation and OA condensation/evaporation
Source: Copernicus journal article supplement (doi:10.5194/acp-2022-349), 2022-05-30

## Referee #1

We thank the referee for their time and helpful comments.

### Major comments

Key factor controlling aerosol size distribution in biomass burning plumes is interesting and important topic in current air quality and climate change studies. This work analyzed the impact of plume concentration on coagulation and OA condensation/evaporation based on FIREX-AQ aircraft measurements. They found the median particle diameter increases faster in smoke of a higher initial OA concentration than smoke of a lower initial OA concentration. Their box model simulation suggested that coagulation explains the majority of the diameter growth and OA evaporation/condensation having a relatively minor impact on the diameter growth. Although the authors provided systemic analysis with FIREX-AQ measurements, the results found by them are not novelty. Similar results have been reported by previous studies. The authors need to highlight their new findings in this work.

*There are several novel aspects of our study, and we have now added text to point these out more explicitly. While previous studies have concluded that coagulation explains the majority of aerosol number size distribution changes, we're unaware of a study that has investigated this for a large number of pseudo-Lagrangian samples. We show in field data that coagulation dominates the aerosol size distribution changes, this had only been speculated in prior field data and shown in theoretical studies. We also investigate in-plume gradients in much greater detail than the Hodshire et al. (2021) study, showing relationships between plume concentration and plume evolution in both transect averaged and in gradients within the plume. We show through modeling and calculated mixing times that the mixing within the plume is generally too fast to be able to apply the relationships derived from in-plume gradients to plumes of a similar average concentration. Mixing was not considered in the prior Hodshire study investigating in-plume gradients in this way. The limitations of prior studies are discussed in the introduction. We have added to the final paragraph of the introduction lines stating what is new when we overview the work of this manuscript.*

“We use an aerosol-microphysics model to estimate how much of the aerosol size growth is due to coagulation versus OA condensation/evaporation; the first study to show in multiple Pseudo-lagrangian transects of smoke plumes the dominance of coagulation. Finally, we investigate the timescale of mixing between the more and less concentrated regions of plumes to determine if aging in these portions of the plumes can be assumed to occur independently; prior studies have not investigated this role of mixing.”

For the writing style of this manuscript, too much Figures were put in supporting material with unnecessary. It broke the logical flow of the paper.

*We (at least June and Pierce, the main 2 authors writing the manuscript and responding to the comments) have tried to balance relative conciseness (still 8 figures and 2 tables in the revised manuscript, so not \*that\* concise) and completeness (wanting to show correction*

*factors, sensitivities to assumptions, and the underlying data). We feel that moving figures from the SI to the main text will make the paper unwieldy for the average reader, while deleting SI figures would create a “just take our word for it” aspect to the paper that we seek to avoid.*

There are some scientific questions need to be addressed.

1. Most of the authors’ analysis is based on smoke age. However, the definition of smoke age in this work is too simple and seems not to reflect the impact of turbulence and wind shifting. However, the uncertainties of smoke age could impact significantly on the authors’ analysis, discussions, and conclusions.

*We have added a sentence acknowledging the uncertainties related to smoke age. We also now discuss how we believe these are likely smaller than other uncertainties in the data (e.g., the known issues of imperfect Lagrangian sampling). We continue to use the straight line horizontal advection definition of smoke age, as this is how the physical smoke age has been defined in prior studies examining the physical aging of smoke.*

*“Although there are likely uncertainties in the smoke age due to the wind shifting directions and wind velocity varying within the plume, these uncertainties are likely smaller than the uncertainty due to issues of imperfect Lagrangian aircraft sampling.”*

2. One of the major conclusions is the authors found OA evaporation/condensation having a relatively minor impact on the diameter growth. However, this conclusion is based on box model simulation. As shown in the simulations presented in the paper, OA condensation in young age plume and OA evaporation in old age plume seem not to be reflected by the box model.

*The OA changes are not predicted by the model. Rather, OA evaporation/condensation in the model is given as an input from the observed changes in the OA enhancement ratio. This is detailed in the methods (Sect. 2.2), and stated with the modeled results “OA condensation/evaporation was included in the model based on the observed trends in OA (Fig. 5c) and Eq. 6.” We are unclear what time scales are being referred to as young and old in this comment; however, past observational studies have shown that in near term aging 0 to 8 hours, as we consider in this study, OA can experience either condensation or evaporation or no net change. In the theoretical studies of Bian et al. (2017) and Hodshire et al. (2019b), quickly diluting plumes were predicted to have net evaporation in the first ~30 minutes followed by net condensation (the opposite that the reviewer suggests), and the initial OA:CO ratios tend to support this, where the plumes with lower OA concentrations at the first transect have lower OA:CO ratios at the first transect, which is evidence of early initial evaporation in these plumes. The plume simulations, however, start at the first transect and hence do not include this evaporation before the first transect.*

3. The authors used linear regression to fit the dependence of median diameter with smoke age. Median diameter cannot increase without limitation. I do not think linear regression is suitable to be used here.

*We added a sentence to the methods section noting that the linear regression slopes are not intended to be extrapolated beyond the time frame of the FIREX-AQ observations (2 to 7 hours). We refer to the slope from the linear regression of median diameter with smoke age as an average growth rate, which suggests the instantaneous growth rate is not necessarily constant, even within the observed time period. We chose the use of linear regression since it allows us to determine the relationship of a single parameter (average growth rate) with plume concentration. The use of a non-linear function would introduce multiple parameters, limiting the ability to clearly determine the impact of plume concentration on growth. We agree that median diameter cannot increase without limitation, this is discussed in the paper in the modeling section, where we point out differences in the dilution rate leading to a faster/slower decrease in the coagulation rate.*

Minor comments

Line29:  $\mu\text{g m}^{-3}$ . -3 needs to be superscript. Please check the unit in the paper.

*Fixed.*

Line200: Change x to multiple sign.

*Fixed.*

Line 239-240: How do the authors think about the impact of wind direction/shifting on their method to calculate the smoke age? Wind direction may not always follow the straight-line between the fire and aircraft position.

*As noted above, we have added a sentence acknowledging the uncertainty in the smoke age due to assuming straight-line advection.*

*“Although there are likely uncertainties in the smoke age due to the wind shifting directions and wind velocity varying within the plume, these uncertainties are likely smaller than the uncertainty due to issues of imperfect Lagrangian aircraft sampling.”*

Page8Equation2: It is unclear what do inplume and background refer to. Does inplume refer to the value sampled at aircraft position in plume? Where are the background values sampled?

*We have added definitions of the “in plume” and background subscripts used in the equation to the prior paragraph. And we have added a sentence on where background values are sampled.*

*“The concentration enhancement of species X due to the presence of smoke ( $\Delta X$ ) is determined by subtracting the average background concentration ( $X_{background}$ ) of this species from the in-plume measurements ( $X_{inplume}$ ). Background concentrations are an average concentration measured outside the plume at the same altitude as the aircraft sampled the plume.”*

Line304: More details about the assumptions, settings, and initial conditions to run the coagulation model are needed. Based on current information, it is hard to reproduce the results presented in this work.

*We have added details about the temperature and pressure used in coagulation kernel calculation, and we have rearranged the paragraph so the initialization information is easier to find.*

*“In the Brownian coagulation kernel calculation, we assume a particle density of  $1400 \text{ kg m}^{-3}$ , and assume the temperature and pressure are the average of the in-plume measurements.”*

*In the previous version, standard temperature and pressure were used in our simulations with number concentration in standard  $\text{cm}^{-3}$ . In this version, we have adjusted the simulations to use ambient number concentration and average temperature and pressure of the in-plume measurements. The simulation results are similar to the previous version and conclusions have not changed.*

Line339-341: I agree with the authors’ discussion that the diameter growth rates should be slowed with the smoke age. However, according to Fig.2, we did not see such slowdown. The authors need to explain this disagreement.

*We have added a sentence noting the variability of the growth rate slowing between transects. We discuss this in context of the model results shown in Fig. 7.*

*“The rate of the growth slow down varies between sets of transects, and in days such as Williams Flats 8/7 P2 the slow down is not noticeable to slow dilution; the growth slow down is discussed more in Sect. 3.2 with the model results.”*

Line455: Why does median diameter drop after 5h in Fig.7b? Why is median diameter low during 0.5-1.5h and then rapid increased after 1.5h in Fig.7c?

*For both of these, we believe they are due to imperfect Langrangian sampling by the aircraft (both in terms of rate of flying downwind and potentially also the vertical position within the plume), which results in variability in the observed median diameter. The observed*

*median diameter is discussed with Fig. 2 and Fig. 3 in Sect. 3.1. We have added a sentence to briefly restate these claims in the discussion of Fig. 7.*

*“Some of the disagreement between the model and observations may be due to the lack of pseudo-Lagrangian aircraft sampling, especially noticeable in Fig. 7b and 7c, as discussed in Sect. 3.1.”*

Line475-477: Need to explain the reason why the change from non-size-dependent evaporation to size-dependent evaporation in model is small.

*This change is small because the assumed diameter (300 nm) used in the non-size dependent evaporation correction is near that of the observed peak diameter. We have added text to clarify.*

*“Changing from the non-size-dependent evaporation correction to a size-dependent evaporation correction based on Fig. S4b does not change the agreement of the modeled and observed median diameters because the modeled coagulation rate is unchanged, and only a minor shift in median diameter occurred because the assumed diameter of 300 nm used for the non-size-dependent evaporation correction is near the observed peak diameter (Fig. S14).”*

Line478: Can it be caused by the treatment of dilution in the box model?

*The sentence at this line is, “The observed trends in the number enhancement ratio are noisier than the trends in  $D_{pm}$ , but the model still is able to capture some of the reduction in number as a result of coagulation (Fig. S13).” This sentence is primarily about noise in the observations, so we are unsure what the reviewer is suggesting. We cannot think about why the treatment of dilution in the box model would help the model capture the noise in the number enhancement observations.*

Line489-490: Why does the impact of changing emission on number concentration is larger than size distribution?

*Our hypothesis is that the N:CO emissions ratio may change with fire changes over several hours while the emitted diameter is not changing. We have added this as a discussion point related to Fig. 4.*

*“The aerosol number enhancement ratio could be less correlated with smoke age than  $D_{pm}$  due to a changing N:CO emissions ratio from the fire during the period of imperfect pseudo-Lagrangian sampling (with the plane moving downwind  $\sim 4x$  faster than the wind speed).”*

Line491-492: In Fig.7b and Fig.7g, the consideration of OA evaporation/condensation reduced the agreement of simulation and observation. More discussions on this are needed. Usually, young age plume is dominated by OA condensation, while old age plume is dominated by OA evaporation. I did not see this reflected in these simulations. Do the authors know why the simulation works this way?

*We have added discussion to the text on the reduction of agreement between the modeled and observed median diameter for two of the cases.*

*“Two cases, Castle 8/12 and Williams Flats 8/3 P2, had reductions in model agreement with the inclusion of OA condensation/evaporation. For Castle 8/12, condensation resulted in an overestimation of the growth; however, this bias is not greater than the uncertainty of the measurement. Net evaporation was observed during Williams Flats 8/3 P2 resulting in underprediction of the growth.”*

*As noted in the text, the OA evaporation/condensation in the model is constrained by the observations (Fig. 5c and Fig. S8). The observations do not show condensation in the early transects with evaporation in the older transects. Our study is constrained to the 0 to 8 hours of aging that were sampled by the aircraft.*

Page28Fig1: Map shown here is helpless to readers who are not familiar with local geography of Idaho. Map with land use type is more useful.

*We have added elevation of the region to the map.*

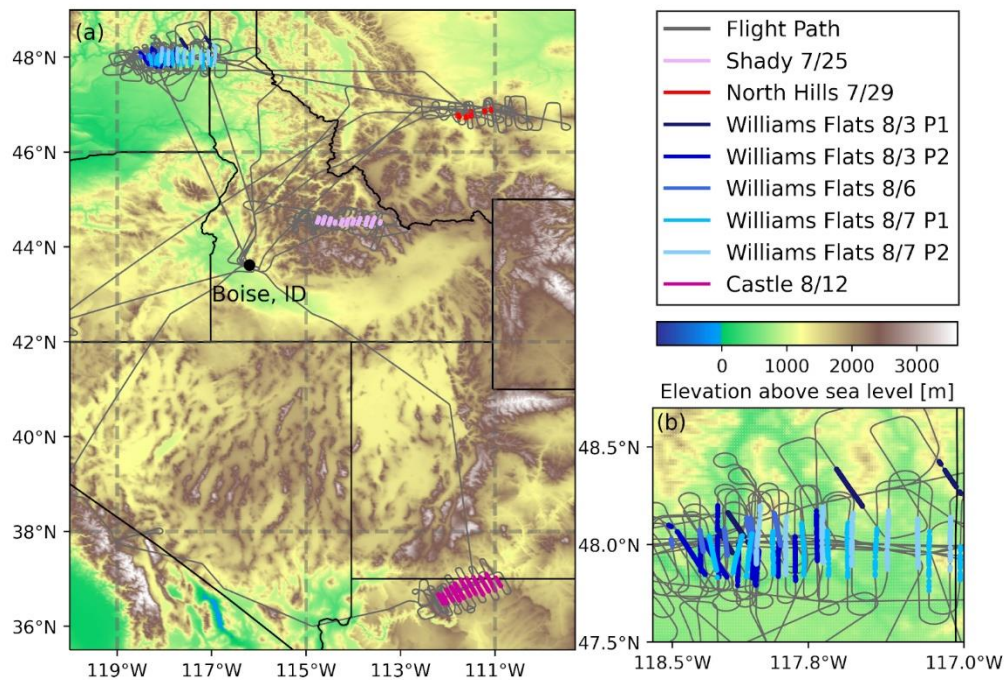

Supplement: Supplementary file [file acp-2022-349-AC1-supplement.pdf]
